# Supplementary material for: Nasal administration of mesenchymal stem cells restores cisplatin-induced cognitive impairment and brain damage in mice
Source: PubMed Central journal article supplement (PMC6238972; doi:10.18632/oncotarget.26272), 2018-10-30
Supplement: oncotarget-09-35581-s001.pdf [file oncotarget-09-35581-s001.pdf]

## Nasal administration of mesenchymal stem cells restores cisplatin-induced cognitive impairment and brain damage in mice

### SUPPLEMENTARY MATERIALS

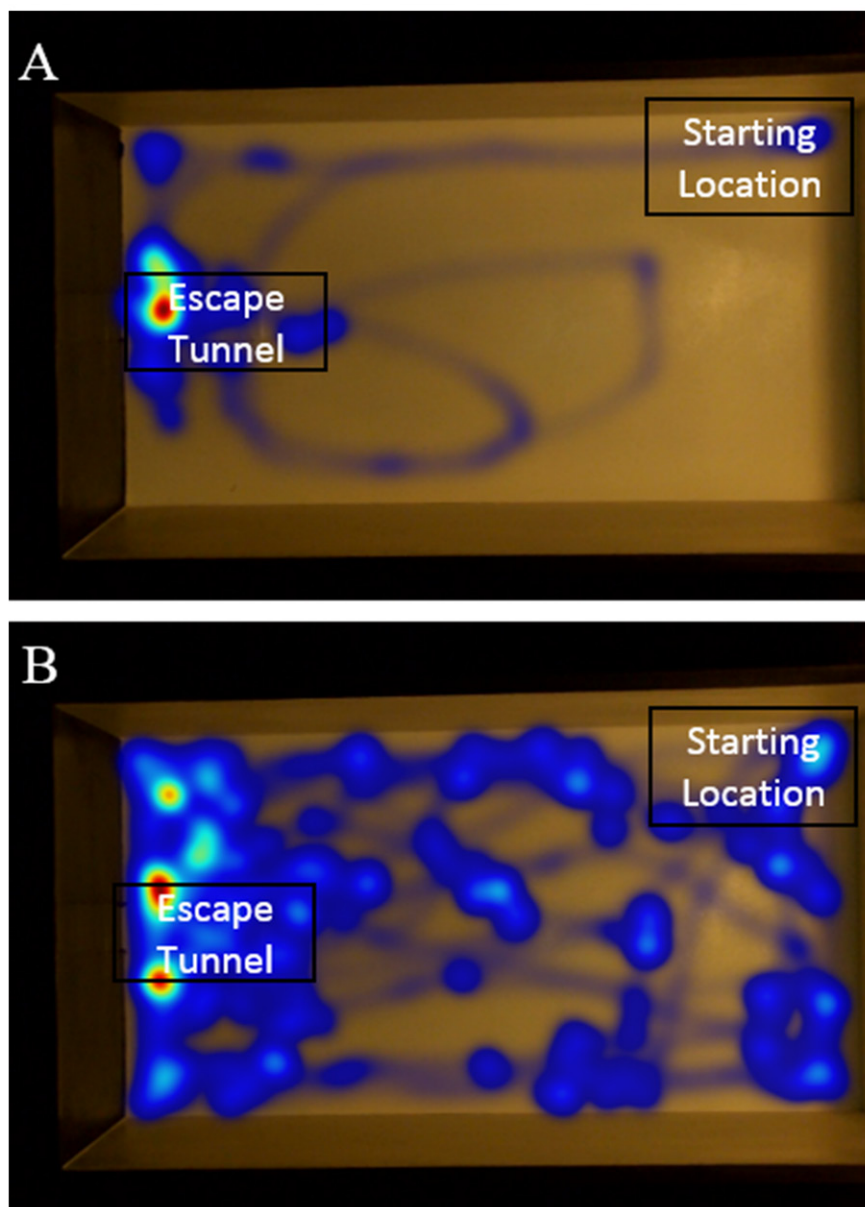

**Supplementary Figure 1: Representative heat map of time spent in the light compartment of the puzzle box.** Male mice were treated with cisplatin and MSC, and the PBT was performed as in Figure 1A. Representative heat map of time spent in the light compartment of the puzzle box of PBS (A) and cisplatin-treated (B) male mice in trial 8 (first difficult trial).

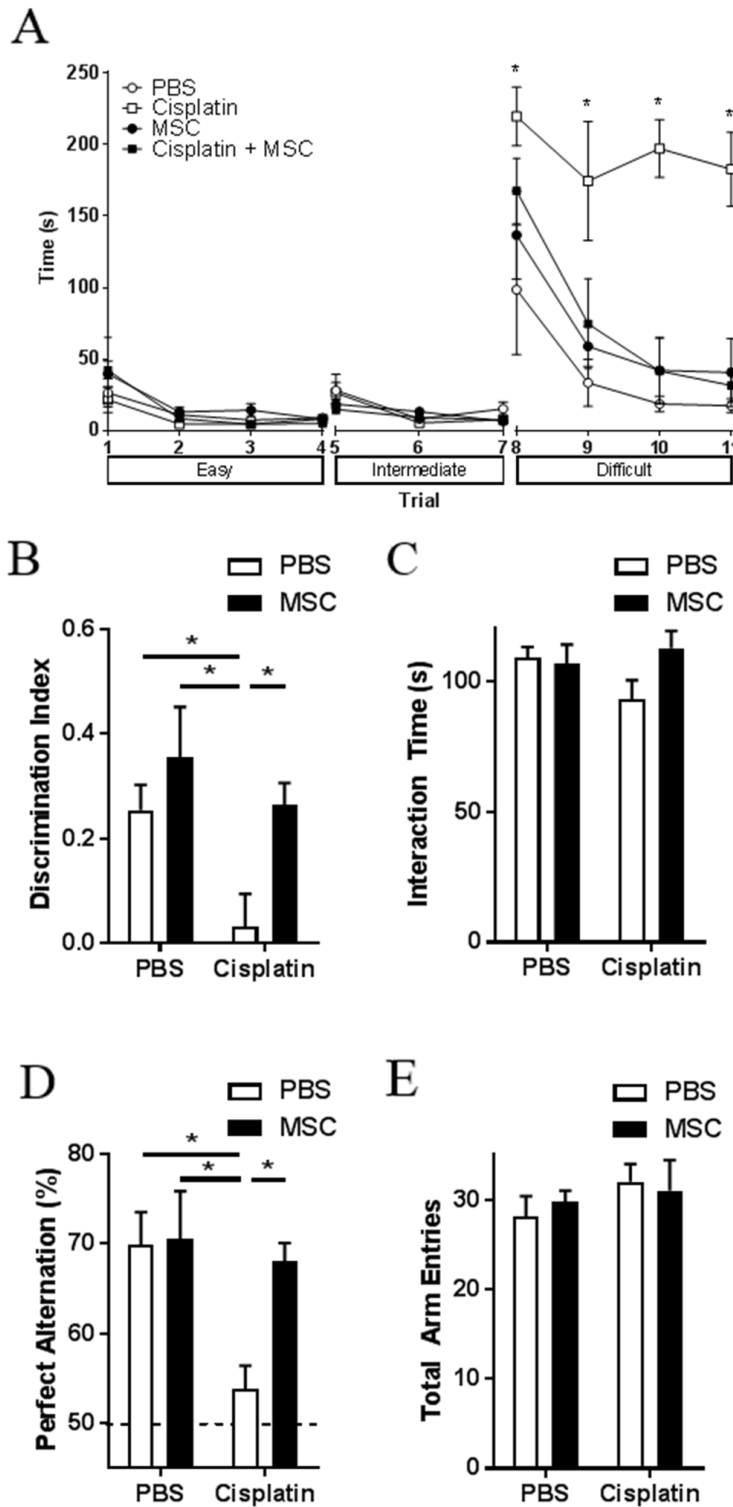

**Supplementary Figure 2: Effect of nasally administered MSC on cisplatin-induced cognitive impairments in female mice.** (A) Female mice were treated with cisplatin and MSC, and the PBT was performed as with the male mice in Figure 1A.  $n = 4-7$ . *Tukey post hoc*:  $^*P < 0.05$  versus PBS controls. (B) Female mice were treated with cisplatin and MSC, and the NOPRT was performed.  $n = 4-7$ . *Tukey test*:  $^*P < 0.05$  versus PBS controls. (C) Total interaction times in the NOPRT were not affected by cisplatin and MSC treatment in female mice.  $n = 4-7$ . Two-way ANOVA Cisplatin x MSC interaction. (D) The percentage spontaneous alternation in a Y-maze was determined 1 day after the completion of the NOPRT in female mice. Dotted line indicates random chance. Results are expressed as means  $\pm$  SEM;  $n = 4-7$ . *Tukey test*:  $^*P < 0.05$ . (E) Total arm entries in the Y-maze were not affected by cisplatin and MSC treatment in female mice.  $n = 4-7$ .

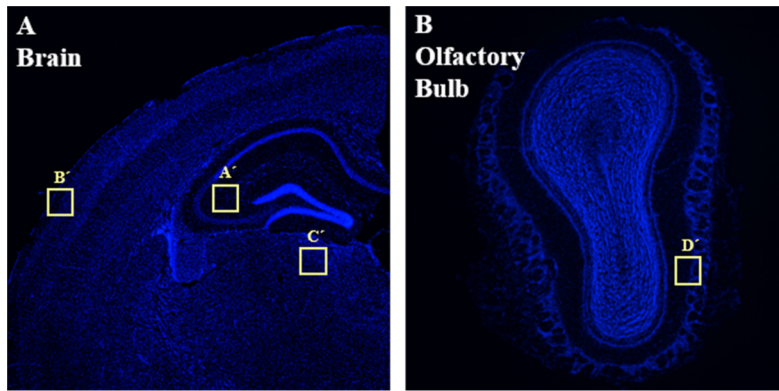

**Supplementary Figure 3: Overview of location where MSC were detected.** Overview of brain (A) and olfactory bulb (B) depicting the location of the images depicted in Figure 2 in the hippocampus (A'), cortex (B'), thalamus (C'), and olfactory bulb (D').

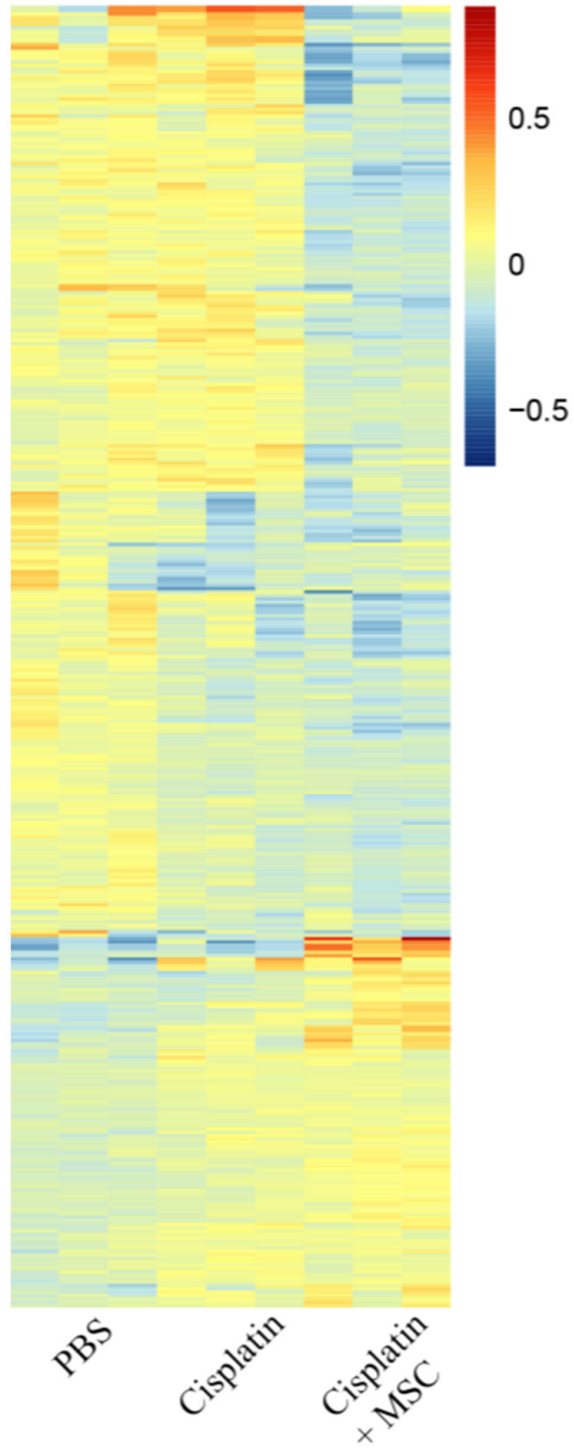

**Supplementary Figure 4: Effects of cisplatin and MSC on gene expression.** Heat map of differentially expressed genes between samples of PBS, cisplatin, and cisplatin + MSC treated animals (adjusted  $p < 0.05$ ).

**A**

EIF2 Signaling : Chemo\_StemChemo\_DEG : Expr Log Ratio

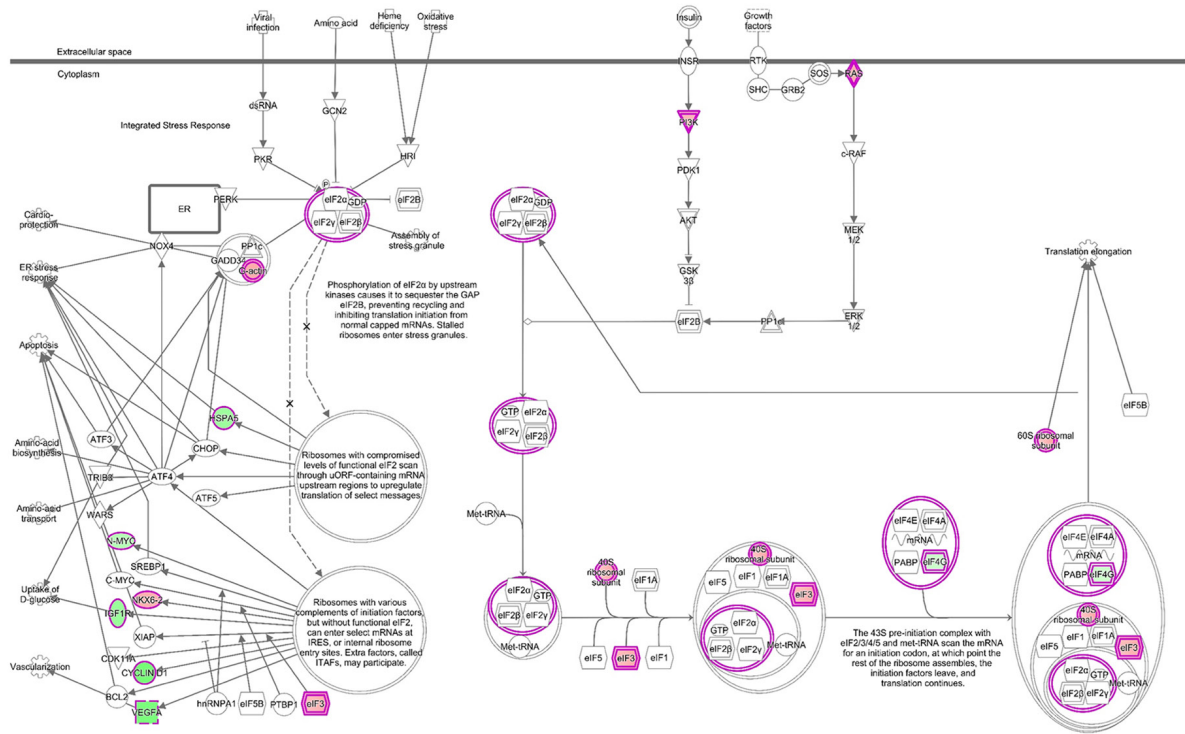**B**

Mitochondrial Dysfunction

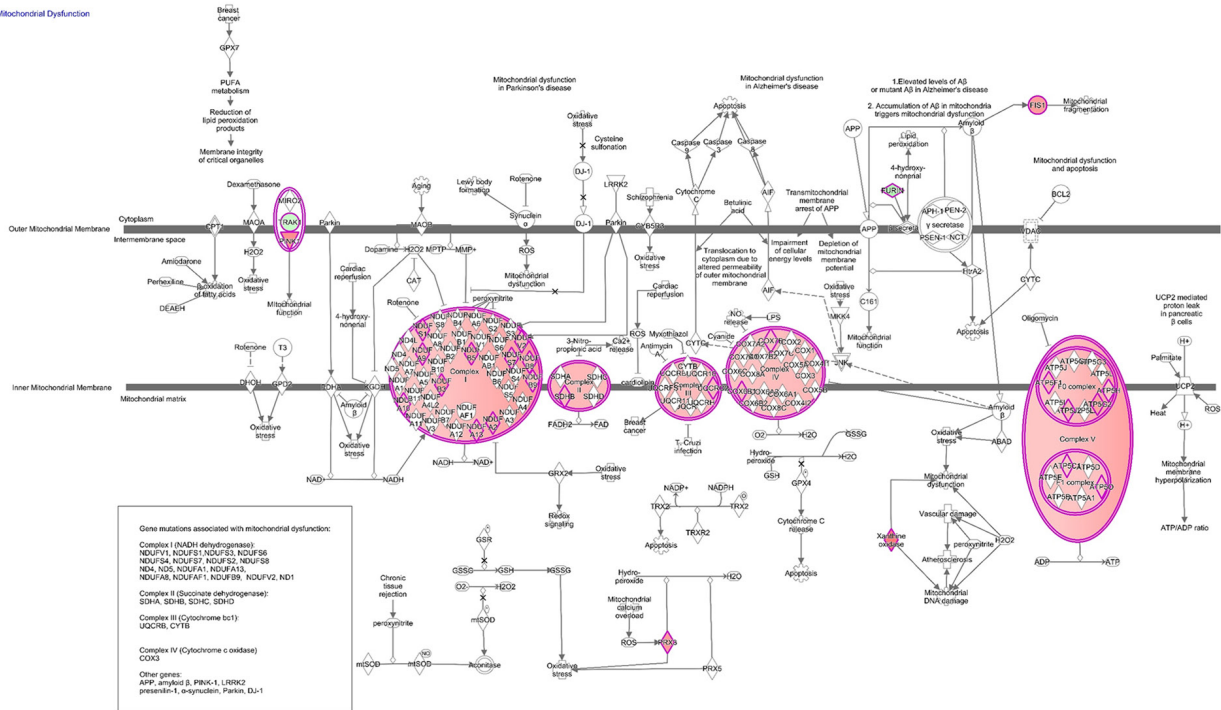

**Supplementary Figure 5: Details on differentially expressed genes in the top five canonical pathways.** Genes that were upregulated (red) or downregulated (green) in response to nasal MSC administration to cisplatin-treated mice for EIF2 signaling (A), mitochondrial dysfunction and oxidative phosphorylation (B)

**C**

Notch Signaling : Chemo\_StemChemo\_DEG : Expr Log Ratio

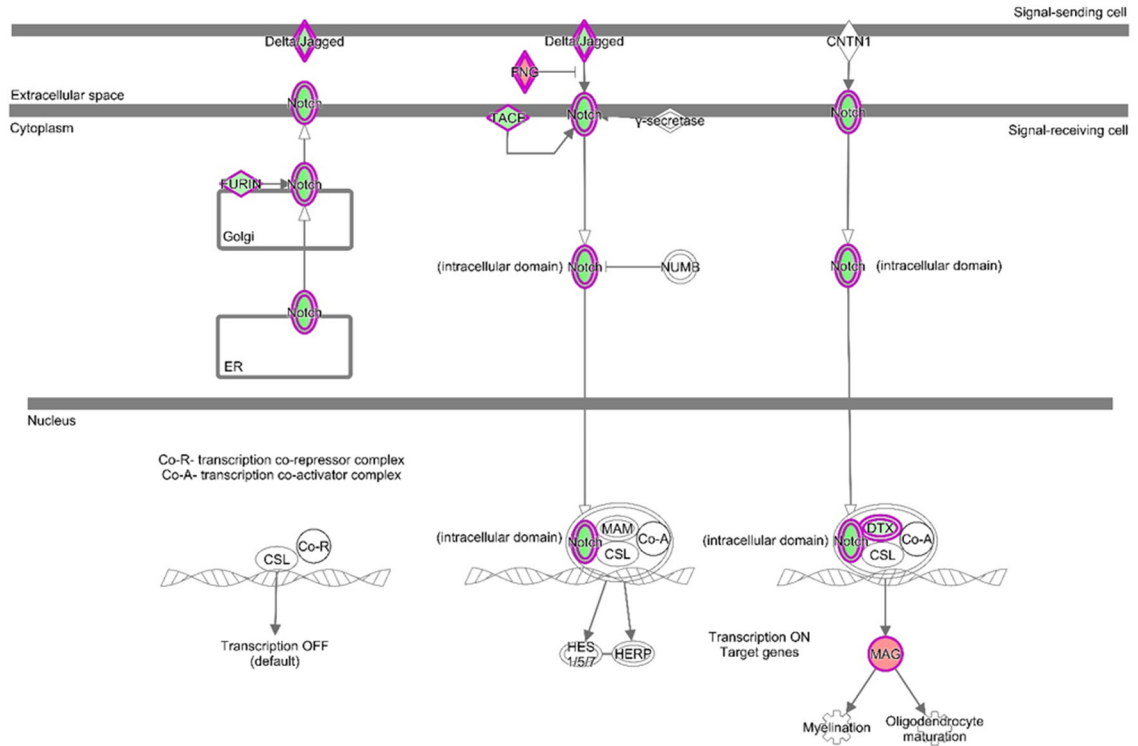

**D**

Wnt/β-catenin Signaling : Chemo\_StemChemo\_DEG : Expr Log Ratio

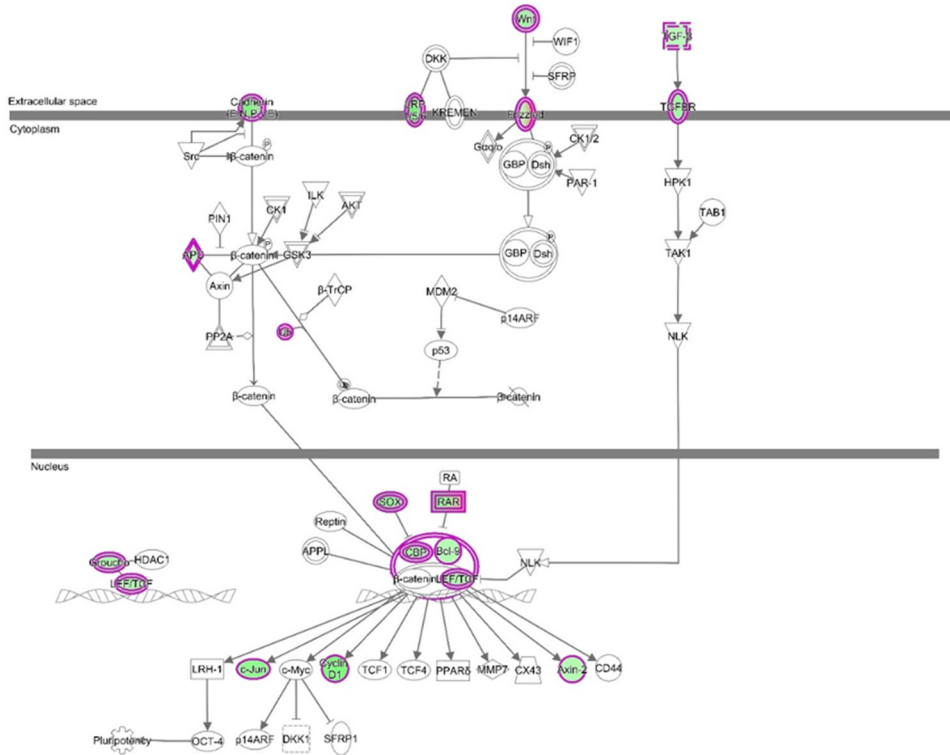

**Supplementary Figure 5: (Continued) Details on differentially expressed genes in the top five canonical pathways. Notch signaling (C), and Wnt/β-catenin signaling (D).**

**Supplementary Table 1: Genes upregulated by cisplatin and normalized by nasal administration of MSCs**

| <b>Symbol</b> | <b>Entrez Gene Name</b>                                                       |
|---------------|-------------------------------------------------------------------------------|
| ACKR1         | atypical chemokine receptor 1 (Duffy blood group)                             |
| ARC           | activity regulated cytoskeleton associated protein                            |
| AXIN2         | axin 2                                                                        |
| Brd4          | bromodomain containing 4                                                      |
| BTG2          | BTG anti-proliferation factor 2                                               |
| CALR          | calreticulin                                                                  |
| CEACAM1       | carcinoembryonic antigen related cell adhesion molecule 1                     |
| CMIP          | c-Maf inducing protein                                                        |
| COL1A1        | collagen type I alpha 1 chain                                                 |
| CTSC          | cathepsin C                                                                   |
| CYR61         | cysteine rich angiogenic inducer 61                                           |
| DUSP1         | dual specificity phosphatase 1                                                |
| DUSP18        | dual specificity phosphatase 18                                               |
| FGF10         | fibroblast growth factor 10                                                   |
| FLT1          | fms related tyrosine kinase 1                                                 |
| FOS           | Fos proto-oncogene, AP-1 transcription factor subunit                         |
| GPR151        | G protein-coupled receptor 151                                                |
| HEXIM1        | hexamethylene bisacetamide inducible 1                                        |
| HSP90B1       | heat shock protein 90 beta family member 1                                    |
| HSPA5         | heat shock protein family A (Hsp70) member 5                                  |
| HSPB1         | heat shock protein family B (small) member 1                                  |
| HSPG2         | heparan sulfate proteoglycan 2                                                |
| IER2          | immediate early response 2                                                    |
| IGF1R         | insulin like growth factor 1 receptor                                         |
| INHBB         | inhibin beta B subunit                                                        |
| JUN           | Jun proto-oncogene, AP-1 transcription factor subunit                         |
| JUNB          | JunB proto-oncogene, AP-1 transcription factor subunit                        |
| LRP1          | LDL receptor related protein 1                                                |
| NECTIN1       | nectin cell adhesion molecule 1                                               |
| NECTIN3       | nectin cell adhesion molecule 3                                               |
| NID2          | nidogen 2                                                                     |
| NPTX1         | neuronal pentraxin 1                                                          |
| NPTX2         | neuronal pentraxin 2                                                          |
| NWD2          | NACHT and WD repeat domain containing 2                                       |
| PDIA3         | protein disulfide isomerase family A member 3                                 |
| PRDM16        | PR/SET domain 16                                                              |
| RTN4RL1       | reticulon 4 receptor like 1                                                   |
| SCUBE1        | signal peptide, CUB domain and EGF like domain containing 1                   |
| SLC12A7       | solute carrier family 12 member 7                                             |
| SOX4          | SRY-box 4                                                                     |
| TGFBR2        | transforming growth factor beta receptor 2                                    |
| THBS1         | thrombospondin 1                                                              |
| UBC           | ubiquitin C                                                                   |
| VWF           | von Willebrand factor                                                         |
| WFIKKN2       | WAP, follistatin/kazal, immunoglobulin, kunitz and netrin domain containing 2 |

**Supplementary Table 2: Genes downregulated by cisplatin and normalized by nasal administration of MSCs**

| <b>Symbol</b> | <b>Entrez Gene Name</b>                                                      |
|---------------|------------------------------------------------------------------------------|
| 1700048O20Rik | RIKEN cDNA 1700048O20 gene                                                   |
| 2810468N07Rik | RIKEN cDNA 2810468N07 gene                                                   |
| ACTN2         | actinin alpha 2                                                              |
| ALDH1A1       | aldehyde dehydrogenase 1 family member A1                                    |
| ANLN          | anillin actin binding protein                                                |
| Bhlhe41       | basic helix-loop-helix family, member e41                                    |
| CIRBP         | cold inducible RNA binding protein                                           |
| CPM           | carboxypeptidase M                                                           |
| DBP           | D-box binding PAR bZIP transcription factor                                  |
| DLX6          | distal-less homeobox 6                                                       |
| EPHA8         | EPH receptor A8                                                              |
| EVI2A         | ecotropic viral integration site 2A                                          |
| Fus           | fused in sarcoma                                                             |
| GATM          | glycine amidinotransferase                                                   |
| GPR83         | G protein-coupled receptor 83                                                |
| HCN2          | hyperpolarization activated cyclic nucleotide gated potassium channel 2      |
| IL33          | interleukin 33                                                               |
| INSIG1        | insulin induced gene 1                                                       |
| KCNAB1        | potassium voltage-gated channel subfamily A member regulatory beta subunit 1 |
| LMO7          | LIM domain 7                                                                 |
| MAG           | myelin associated glycoprotein                                               |
| NKX6-2        | NK6 homeobox 2                                                               |
| PLEKHB1       | pleckstrin homology domain containing B1                                     |
| PPP1R14A      | protein phosphatase 1 regulatory inhibitor subunit 14A                       |
| PRKCH         | protein kinase C eta                                                         |
| RAP1GAP       | RAP1 GTPase activating protein                                               |
| RND2          | Rho family GTPase 2                                                          |
| S100B         | S100 calcium binding protein B                                               |
| SLC22A3       | solute carrier family 22 member 3                                            |
| TBC1D8        | TBC1 domain family member 8                                                  |
